# Supplementary material
Source: Springer Nature journal article supplement (https://www.springermedizin.de/resource/supplementary/12887_2014_1079_MOESM2_ESM.pdf/9476464)

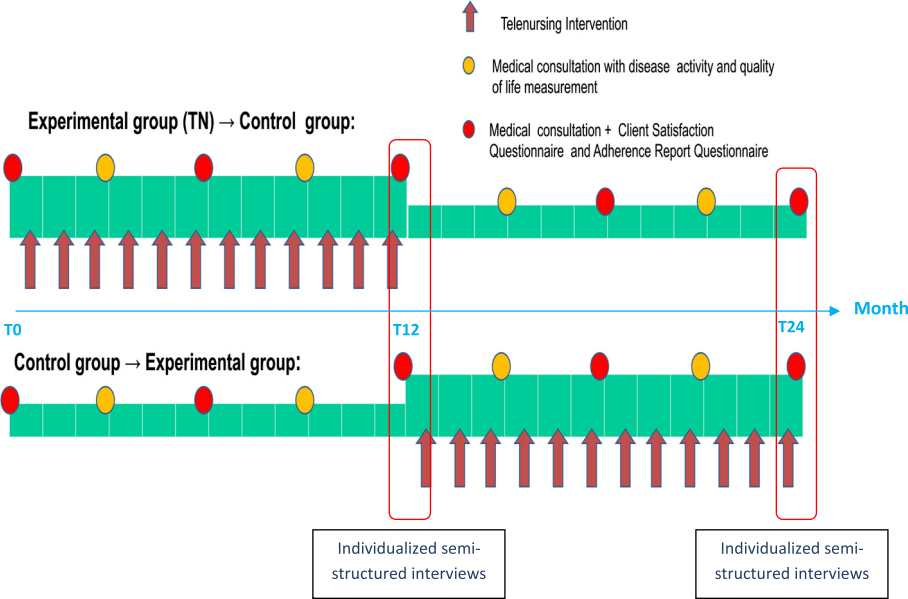

Supplement: MOESM2 [file 9476464]
